# Supplementary material for: Implication of Caspase-3 as a Common Therapeutic Target for Multineurodegenerative Disorders and Its Inhibition Using Nonpeptidyl Natural Compounds
Source: Hindawi journal article supplement (doi:10.1155/2015/379817), 2015-01-01

## Graphical Abstract

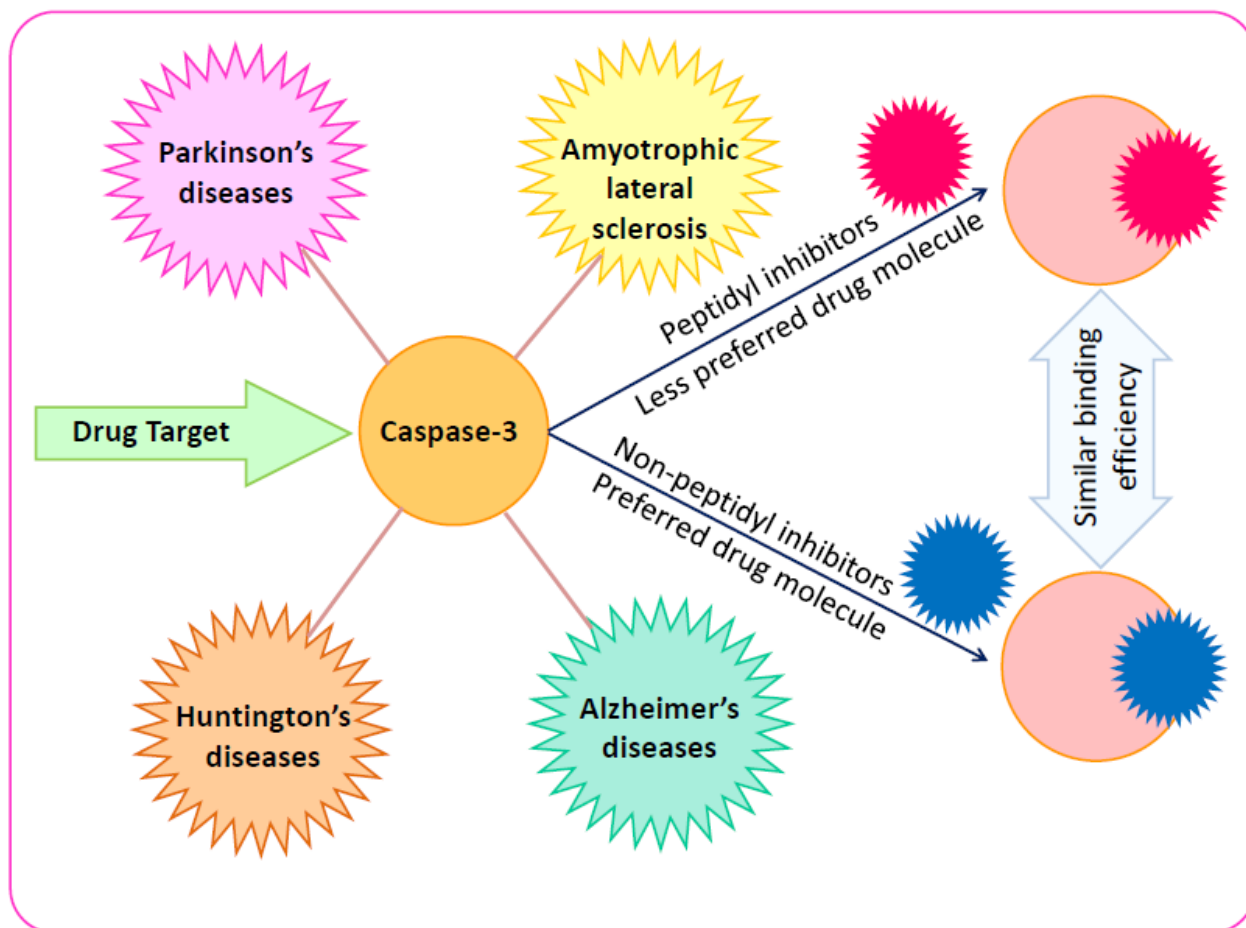

Supplement: f1 [file 379817.f1.pdf]
